# Supplementary material for: Epidemiology of E. coli in Cystic Fibrosis Airways Demonstrates the Capacity for Persistent Infection but Not Patient-Patient Transmission
Source: Front Microbiol. 2020 Mar 20;11:475. doi: 10.3389/fmicb.2020.00475 (PMC7100150; doi:10.3389/fmicb.2020.00475)
Supplement: Supplementary file 3 [file Data_Sheet_3.xlsx]

## Sheet: Sheet1
Supplementary Table 9. List of segregating SNPs among sequenced ST-73 isolates. SNP presence/absence is shown in each isolate's column: 0 indicates the reference base, 1 the first alternate base, 2 the second alternate base, and so on.
Position = position of SNP in reference genome
Ref = reference base at SNP position
Alt = alternate base(s) at SNP position; * = ambiguous base (gap, N)
Columns H to Y = presence/absence of SNP; 0 = reference base, 1 = first alternate base, 2 = second alternate base, -- = ambiguous base call at that position for that isolate
Chromosome	Position	Ref	Alt	Effect	Gene_ID	Gene_Short_Name	A060-E61-18-05-1988	A141-E122-15-08-2000	A141-E22-06-11-1996	A141-E23-17-03-1999	A141-E24-05-12-2001	A141-E25-10-02-2003	A141-E26-12-10-2005	A141-E27-20-06-2007	A141-E87-18-04-2002	A141-E88-22-09-2004	A141-E90-28-08-2006	A312-E47-30-11-2005	A312-E49-18-10-2010
NZ_CP009072	11010	C	G	missense_variant	DR76_RS00060	DR76_RS00060	0	0	0	0	0	0	0	0	0	0	0	1	1
NZ_CP009072	12443	G	T,*	missense_variant	DR76_RS00065	DR76_RS00065	0	1	1	1	1	1	1	1	1	1	2	0	0
NZ_CP009072	135497	G	T	missense_variant	DR76_RS00715	yojI	0	0	0	0	0	0	0	0	0	0	0	1	1
NZ_CP009072	144860	A	G	missense_variant	DR76_RS00750	rcsB	0	0	0	0	0	0	1	1	0	1	1	0	0
NZ_CP009072	153952	T	G	missense_variant	DR76_RS00780	DR76_RS00780	0	1	1	1	1	1	1	1	1	1	1	0	0
NZ_CP009072	167306	G	A	missense_variant	DR76_RS00815	gyrA	0	1	0	0	1	1	1	1	1	1	1	0	0
NZ_CP009072	186308	A	T	stop_gained	DR76_RS00885	DR76_RS00885	0	0	0	0	0	0	0	0	0	0	0	0	1
NZ_CP009072	221388	C	A	missense_variant	DR76_RS01060	nuoG	0	1	1	1	1	1	1	1	1	1	1	0	0
NZ_CP009072	228584	A	G	missense_variant	DR76_RS01085	nuoA	0	0	0	0	0	0	0	0	0	0	0	1	1
NZ_CP009072	272043	C	A	stop_gained	DR76_RS01300	smrB	0	0	0	0	0	0	1	1	0	1	1	0	0
NZ_CP009072	281665	T	G	missense_variant	DR76_RS01350	fadJ	1	1	1	1	1	1	1	1	1	1	1	0	0
NZ_CP009072	293369	C	G	missense_variant	DR76_RS01390	DR76_RS01390	0	0	0	0	0	0	0	0	0	0	0	1	1
NZ_CP009072	294039	C	A	synonymous_variant	DR76_RS01390	DR76_RS01390	0	0	0	0	0	0	0	0	0	0	0	0	1
NZ_CP009072	302551	G	A	missense_variant	DR76_RS01415	dsdX	0	1	1	1	1	1	1	1	1	1	1	0	0
NZ_CP009072	313067	T	C	synonymous_variant	DR76_RS01450	yfdV	0	0	0	0	0	0	1	1	0	1	1	0	0
NZ_CP009072	315162	A	C	missense_variant	DR76_RS01455	DR76_RS01455	0	0	0	0	0	0	0	1	0	1	1	0	0
NZ_CP009072	318117	T	G	intergenic_region	DR76_RS01465-DR76_RS01470	DR76_RS01465-DR76_RS01470	0	1	1	1	1	1	1	1	1	1	1	0	0
NZ_CP009072	434989	G	A	missense_variant	DR76_RS02050	DR76_RS02050	0	0	0	0	0	0	0	0	0	0	0	1	1
NZ_CP009072	435996	G	A	missense_variant	DR76_RS02050	DR76_RS02050	0	0	0	0	0	0	0	0	0	0	0	1	1
NZ_CP009072	445795	T	G	missense_variant	DR76_RS02070	der	0	0	0	0	0	0	0	0	0	0	0	1	1
NZ_CP009072	508348	G	A	intergenic_region	DR76_RS02330-DR76_RS02335	DR76_RS02330-lepB	0	0	0	0	0	0	0	0	0	0	0	1	1
NZ_CP009072	509842	C	T	missense_variant	DR76_RS02340	lepA	1	0	0	0	0	0	0	0	0	0	0	0	0
NZ_CP009072	527809	C	T	synonymous_variant	DR76_RS02430	pssA	0	0	0	0	0	0	0	0	0	0	1	0	0
NZ_CP009072	549003	G	*,A	intergenic_region	DR76_RS02515-DR76_RS02520	DR76_RS02515-argH	0	0	0	1	1	0	0	0	0	0	0	2	2
NZ_CP009072	577863	C	*,T	intergenic_region	DR76_RS02625-DR76_RS02630	DR76_RS02625-DR76_RS02630	0	0	0	0	1	1	1	0	0	0	1	2	2
NZ_CP009072	599374	C	A	missense_variant	DR76_RS02720	glpX	0	0	0	0	0	0	0	0	0	0	0	1	1
NZ_CP009072	665981	C	A	synonymous_variant	DR76_RS03070	DR76_RS03070	0	0	0	0	0	0	0	0	0	0	0	1	1
NZ_CP009072	729604	G	A	missense_variant	DR76_RS03395	DR76_RS03395	0	0	0	0	0	0	0	0	0	0	0	1	1
NZ_CP009072	734360	G	T	missense_variant	DR76_RS03415	xerC	0	1	1	1	1	1	1	1	1	1	1	0	0
NZ_CP009072	742128	G	T	missense_variant	DR76_RS03450	cyaA	0	0	0	0	0	0	0	0	0	0	0	0	1
NZ_CP009072	747249	G	A	intergenic_region	DR76_RS03470-DR76_RS03475	hemY-DR76_RS03475	0	0	0	0	0	0	0	0	0	0	0	1	1
NZ_CP009072	747913	G	A,*	missense_variant	DR76_RS03475	DR76_RS03475	1	1	1	1	--	1	1	1	1	1	1	0	0
NZ_CP009072	749336	T	C	missense_variant	DR76_RS03475	DR76_RS03475	0	0	0	0	0	0	1	1	0	1	1	0	0
NZ_CP009072	750923	C	T	intergenic_region	DR76_RS03480-DR76_RS03485	DR76_RS03480-DR76_RS03485	0	1	1	1	1	1	1	1	1	1	1	0	0
NZ_CP009072	776530	C	T	missense_variant	DR76_RS03620	ilvA	0	0	0	0	0	0	0	0	0	0	0	0	1
NZ_CP009072	784372	C	T	synonymous_variant	DR76_RS03650	DR76_RS03650	1	0	0	0	0	0	0	0	0	0	0	0	0
NZ_CP009072	850095	G	A	missense_variant	DR76_RS03965	dnaN	1	1	1	1	1	1	1	1	1	0	1	1	1
NZ_CP009072	864089	C	A	synonymous_variant	DR76_RS04030	DR76_RS04030	1	0	0	0	0	0	0	0	0	0	0	0	0
NZ_CP009072	866014	G	A	missense_variant	DR76_RS04055	DR76_RS04055	1	0	0	0	0	0	0	0	0	0	0	0	0
NZ_CP009072	894475	T	C	missense_variant	DR76_RS04205	DR76_RS04205	0	0	0	0	0	0	0	0	0	0	0	0	1
NZ_CP009072	899135	C	*,A	intergenic_region	DR76_RS04230-DR76_RS04235	DR76_RS04230-DR76_RS04235	0	0	0	0	1	0	0	0	0	1	1	2	2
NZ_CP009072	904334	C	T	synonymous_variant	DR76_RS04260	DR76_RS04260	0	1	1	1	1	1	1	1	1	1	1	0	0
NZ_CP009072	950913	C	T,*	missense_variant	DR76_RS04490	rfaY	0	1	2	2	1	1	2	2	2	2	1	0	0
NZ_CP009072	993934	C	G	missense_variant	DR76_RS04665	DR76_RS04665	0	0	0	0	0	0	0	0	0	0	0	0	1
NZ_CP009072	1032329	T	C	synonymous_variant	DR76_RS04855	tag	1	0	0	0	0	0	0	0	0	0	0	0	0
NZ_CP009072	1050636	G	A	synonymous_variant	DR76_RS04955	bcsQ	0	1	1	1	1	1	1	1	1	1	1	0	0
NZ_CP009072	1061604	C	T	missense_variant	DR76_RS04980	hmsP	1	0	0	0	0	0	0	0	0	0	0	0	0
NZ_CP009072	1086188	T	C	missense_variant	DR76_RS05065	mdtE	0	1	1	1	1	1	1	1	1	1	1	0	0
NZ_CP009072	1115368	C	T	missense_variant	DR76_RS05215	DR76_RS05215	0	1	1	1	1	1	1	1	1	1	1	0	0
NZ_CP009072	1121661	C	T	missense_variant	DR76_RS05235	DR76_RS05235	0	0	0	0	0	0	0	0	0	0	0	1	1
NZ_CP009072	1137769	T	C	synonymous_variant	DR76_RS05330	zntA	0	0	0	0	0	0	0	0	0	0	0	1	1
NZ_CP009072	1149308	A	C	missense_variant	DR76_RS05390	livk	0	0	0	0	1	1	0	0	1	0	0	0	0
NZ_CP009072	1189339	C	A,*	missense_variant	DR76_RS05560	DR76_RS05560	1	0	0	0	0	0	0	0	2	2	0	0	0
NZ_CP009072	1192523	A	*,G	intergenic_region	DR76_RS05580-DR76_RS05585	DR76_RS05580-DR76_RS05585	0	1	2	1	2	2	2	2	1	1	1	0	0
NZ_CP009072	1207955	A	C	missense_variant	DR76_RS05640	malP	0	1	1	1	1	1	1	1	1	1	1	0	0
NZ_CP009072	1221200	C	T	missense_variant	DR76_RS05695	greB	0	0	0	0	0	0	0	0	0	0	0	1	1
NZ_CP009072	1236972	C	T	synonymous_variant	DR76_RS05770	DR76_RS05770	0	0	0	0	0	0	0	0	0	0	0	1	1
NZ_CP009072	1260882	C	T	missense_variant	DR76_RS05890	tsgA	0	0	0	0	0	0	0	0	0	0	0	1	1
NZ_CP009072	1268617	C	T	missense_variant	DR76_RS05940	DR76_RS05940	0	0	0	0	0	0	0	0	0	0	0	1	1
NZ_CP009072	1295843	G	T	missense_variant	DR76_RS06095	gspD	0	0	0	0	0	0	0	0	0	0	0	0	1
NZ_CP009072	1375741	A	*,G	missense_variant	DR76_RS06575	yhcN	0	0	0	1	1	0	0	0	0	0	0	2	2
NZ_CP009072	1438028	G	A	synonymous_variant	DR76_RS06890	rbfA	0	0	0	0	0	0	0	0	0	0	0	0	1
NZ_CP009072	1440535	T	A	missense_variant	DR76_RS06905	pnp	0	0	0	0	0	0	0	0	0	0	0	0	1
NZ_CP009072	1460114	G	T	stop_gained	DR76_RS07010	agaC	0	1	1	1	1	1	1	1	1	1	1	0	0
NZ_CP009072	1494841	T	C	synonymous_variant	DR76_RS07185	DR76_RS07185	0	0	0	0	0	0	0	0	0	0	0	1	1
NZ_CP009072	1512371	A	G	missense_variant	DR76_RS07275	DR76_RS07275	0	1	1	1	1	1	1	1	1	1	1	0	0
NZ_CP009072	1530698	T	C	missense_variant	DR76_RS07345	rpoD	0	1	1	1	1	1	1	1	1	1	1	0	0
NZ_CP009072	1579038	G	A	missense_variant	DR76_RS07580	DR76_RS07580	0	0	0	0	0	0	0	0	0	0	0	1	1
NZ_CP009072	1584052	G	*,T	missense_variant	DR76_RS28915	hcp	1	1	1	1	1	0	1	0	1	1	0	2	2
NZ_CP009072	1611550	C	A	synonymous_variant	DR76_RS07745	DR76_RS07745	1	0	0	0	0	0	0	0	0	0	0	0	0
NZ_CP009072	1636543	G	T	synonymous_variant	DR76_RS07880	DR76_RS07880	1	1	1	1	1	1	1	1	0	1	1	1	1
NZ_CP009072	1648140	A	C	missense_variant	DR76_RS07930	glcB	0	0	0	0	1	0	0	0	0	0	0	0	0
NZ_CP009072	1649360	G	T	synonymous_variant	DR76_RS07935	glcA	0	1	1	1	1	1	1	1	1	1	1	0	0
NZ_CP009072	1654655	G	A,*	intergenic_region	DR76_RS07960-DR76_RS07965	DR76_RS07960-DR76_RS07965	1	2	2	1	0	2	1	1	1	2	2	1	1
NZ_CP009072	1664838	C	*,G	missense_variant	DR76_RS08000	DR76_RS08000	--	--	0	--	0	--	--	0	--	--	--	2	2
NZ_CP009072	1665295	C	T	missense_variant	DR76_RS08000	DR76_RS08000	1	0	0	0	0	0	0	0	0	0	0	0	0
NZ_CP009072	1672751	T	C,*	intergenic_region	DR76_RS08025-DR76_RS29465	DR76_RS08025-DR76_RS29465	1	2	1	1	1	1	1	0	2	2	1	1	1
NZ_CP009072	1676163	T	*,C	missense_variant	DR76_RS08045	DR76_RS08045	1	1	0	1	1	1	1	2	1	1	1	2	1
NZ_CP009072	1699716	A	*,G	intergenic_region	DR76_RS28930-DR76_RS25965	DR76_RS28930-hha	1	1	0	1	1	1	1	1	1	1	1	2	2
NZ_CP009072	1710860	T	C,*	missense_variant	DR76_RS08250	DR76_RS08250	1	2	2	1	2	1	2	1	0	2	1	1	1
NZ_CP009072	1722595	T	C	synonymous_variant	DR76_RS08300	iucD	1	1	1	1	1	1	1	1	1	0	1	1	1
NZ_CP009072	1723017	T	C,*	synonymous_variant	DR76_RS08305	iutA	1	1	1	1	1	1	--	1	0	1	1	1	1
NZ_CP009072	1724171	A	G,T	missense_variant	DR76_RS08305	iutA	1	1	1	1	1	1	1	1	1	1	1	1	2
NZ_CP009072	1724331	G	T,*	synonymous_variant	DR76_RS08305	iutA	1	1	1	1	1	1	1	1	1	0	--	1	1
NZ_CP009072	1724385	G	A	synonymous_variant	DR76_RS08305	iutA	1	1	1	1	1	1	1	1	1	1	0	1	1
NZ_CP009072	1733884	T	C	synonymous_variant	DR76_RS08360	DR76_RS08360	1	1	1	1	1	1	1	1	0	0	0	1	1
NZ_CP009072	1735273	T	*,C	intergenic_region	DR76_RS08360-DR76_RS08370	DR76_RS08360-iha	0	1	1	2	1	1	1	1	1	1	2	2	2
NZ_CP009072	1735307	G	A,*	intergenic_region	DR76_RS08360-DR76_RS08370	DR76_RS08360-iha	1	1	2	1	2	1	2	1	1	0	1	1	1
NZ_CP009072	1741973	G	A	missense_variant	DR76_RS26520	DR76_RS26520	0	0	0	0	0	0	0	0	0	0	0	1	1
NZ_CP009072	1742878	T	C,*	intergenic_region	DR76_RS26520-DR76_RS28960	DR76_RS26520-DR76_RS28960	1	2	1	0	1	2	1	2	1	2	2	1	1
NZ_CP009072	1745181	T	C,*	synonymous_variant	DR76_RS08465	DR76_RS08465	1	0	1	1	2	1	1	2	2	2	1	1	1
NZ_CP009072	1757894	A	G,*	intergenic_region	DR76_RS08555-DR76_RS08560	DR76_RS08555-hlyD	1	1	1	1	0	1	1	1	2	2	0	2	2
NZ_CP009072	1804180	T	C,*	synonymous_variant	DR76_RS08795	DR76_RS08795	1	1	1	1	1	1	1	1	2	0	1	1	1
NZ_CP009072	1819381	T	A	synonymous_variant	DR76_RS08875	DR76_RS08875	1	1	1	1	1	1	1	1	1	1	1	0	0
NZ_CP009072	1902626	C	T	missense_variant	DR76_RS09230	DR76_RS09230	0	0	0	0	0	0	0	0	0	0	0	1	0
NZ_CP009072	1910957	G	A	missense_variant	DR76_RS09280	DR76_RS09280	0	0	0	0	0	0	0	0	0	0	0	1	1
NZ_CP009072	1922355	C	T	synonymous_variant	DR76_RS09310	recB	0	0	0	0	0	0	0	0	0	0	0	1	1
NZ_CP009072	1954826	C	T	intergenic_region	DR76_RS09435-DR76_RS09440	hcp-DR76_RS09440	0	0	0	0	0	0	0	0	0	0	0	1	1
NZ_CP009072	1977681	T	G	missense_variant	DR76_RS09555	xni	1	0	0	0	0	0	0	0	0	0	0	0	0
NZ_CP009072	1990376	C	T	missense_variant	DR76_RS09615	gudD	0	0	0	0	0	0	0	0	0	0	0	1	1
NZ_CP009072	2019317	A	*,C	missense_variant	DR76_RS09735	cysJ	0	0	0	0	0	0	0	0	0	0	1	2	2
NZ_CP009072	2066924	A	T	missense_variant	DR76_RS09990	norW	0	0	0	0	0	0	0	0	0	0	0	1	0
NZ_CP009072	2086618	C	T	synonymous_variant	DR76_RS10120	luxS	1	0	0	0	0	0	0	0	0	0	0	0	0
NZ_CP009072	2102497	A	T	intergenic_region	DR76_RS10195-DR76_RS10200	nrdH-DR76_RS10200	0	0	0	0	0	0	0	0	0	0	0	0	1
NZ_CP009072	2106803	C	T	synonymous_variant	DR76_RS10225	stpA	0	1	1	1	1	1	1	1	1	1	1	0	0
NZ_CP009072	2178518	C	A	synonymous_variant	DR76_RS10600	purD	0	1	1	1	1	1	1	1	1	1	1	0	0
NZ_CP009072	2192624	C	T	synonymous_variant	DR76_RS10655	aceK	0	1	1	1	1	1	1	1	1	1	1	0	0
NZ_CP009072	2225288	C	T	synonymous_variant	DR76_RS10810	lamB	0	0	0	0	0	0	0	0	0	0	0	1	1
NZ_CP009072	2242648	G	A	missense_variant	DR76_RS10890	DR76_RS10890	0	1	1	1	1	1	1	1	1	1	1	0	0
NZ_CP009072	2294824	C	T	missense_variant	DR76_RS11115	DR76_RS11115	0	0	0	0	0	0	0	0	0	0	0	0	1
NZ_CP009072	2342732	C	T	missense_variant	DR76_RS11345	melA	0	0	0	0	0	0	0	0	0	0	0	0	1
NZ_CP009072	2359226	C	T,A	missense_variant	DR76_RS11420	DR76_RS11420	0	1	0	0	0	0	0	0	0	0	0	2	2
NZ_CP009072	2364494	C	T	stop_gained	DR76_RS11450	DR76_RS11450	0	0	0	0	0	0	0	0	0	0	0	0	1
NZ_CP009072	2381427	C	T	missense_variant	DR76_RS11545	epmA	0	0	0	0	0	0	0	0	0	0	0	1	1
NZ_CP009072	2391779	G	A	missense_variant	DR76_RS11590	DR76_RS11590	0	0	0	0	0	0	1	1	0	1	1	0	0
NZ_CP009072	2492719	G	A,*	intergenic_region	DR76_RS12075-DR76_RS12080	holC-pepA	0	1	0	0	1	0	1	1	2	2	2	0	1
NZ_CP009072	2492748	T	*,C	intergenic_region	DR76_RS12075-DR76_RS12080	holC-pepA	1	1	1	0	1	2	2	1	1	1	0	1	1
NZ_CP009072	2497130	T	C	synonymous_variant	DR76_RS12095	DR76_RS12095	1	1	1	1	1	1	1	1	1	1	0	1	1
NZ_CP009072	2498430	G	A,*	missense_variant	DR76_RS12095	DR76_RS12095	1	1	1	2	1	0	2	1	2	2	2	1	1
NZ_CP009072	2498750	G	A	synonymous_variant	DR76_RS12100	ahr	1	1	1	1	1	1	1	1	1	1	0	1	1
NZ_CP009072	2511360	G	A	synonymous_variant	DR76_RS25915	DR76_RS25915	1	1	1	1	1	1	1	1	1	0	1	1	1
NZ_CP009072	2511425	G	A,*	missense_variant	DR76_RS25915	DR76_RS25915	1	0	1	1	1	1	1	1	1	--	1	1	1
NZ_CP009072	2523184	C	T	intergenic_region	DR76_RS12230-DR76_RS12235	DR76_RS12230-DR76_RS12235	0	0	0	0	0	0	0	1	0	0	0	0	0
NZ_CP009072	2538167	C	T,*	synonymous_variant	DR76_RS12310	DR76_RS12310	1	0	2	0	0	2	2	2	2	2	2	0	0
NZ_CP009072	2576128	T	C	intergenic_region	DR76_RS12515-DR76_RS12520	DR76_RS12515-DR76_RS12520	0	0	0	0	0	0	0	0	0	0	0	1	1
NZ_CP009072	2597655	G	*,A	intergenic_region	DR76_RS12635-DR76_RS29050	DR76_RS12635-DR76_RS29050	0	0	1	0	1	0	0	0	1	1	1	2	2
NZ_CP009072	2640020	C	A,*	intergenic_region	DR76_RS12840-DR76_RS12845	fhuF-DR76_RS12845	1	1	1	1	1	1	1	1	--	0	1	1	1
NZ_CP009072	2640087	C	T	intergenic_region	DR76_RS12840-DR76_RS12845	fhuF-DR76_RS12845	1	1	1	1	1	1	1	1	1	0	1	1	1
NZ_CP009072	2640917	A	G,*	intergenic_region	DR76_RS12860-DR76_RS12870	DR76_RS12860-rsmC	1	0	1	1	0	1	1	--	1	--	--	1	1
NZ_CP009072	2640922	T	C,*	intergenic_region	DR76_RS12860-DR76_RS12870	DR76_RS12860-rsmC	1	0	1	1	--	1	1	--	1	--	--	1	1
NZ_CP009072	2648629	T	A,*	intergenic_region	DR76_RS12910-DR76_RS12915	DR76_RS12910-yjjW	1	--	--	--	--	0	--	--	--	--	--	1	1
NZ_CP009072	2648642	T	*,G	intergenic_region	DR76_RS12910-DR76_RS12915	DR76_RS12910-yjjW	0	--	0	0	0	0	--	--	--	--	--	2	2
NZ_CP009072	2653564	T	C	intergenic_region	DR76_RS12935-DR76_RS12940	deoA-deoB	0	0	0	0	0	0	1	1	0	1	1	0	0
NZ_CP009072	2656149	T	C,*	synonymous_variant	DR76_RS29060	lplA	1	1	1	1	0	1	2	1	1	2	2	1	1
NZ_CP009072	2668445	G	A,*	synonymous_variant	DR76_RS13015	creA	1	1	1	0	1	1	1	1	1	2	1	1	1
NZ_CP009072	2716034	A	G	missense_variant	DR76_RS13260	caiA	0	0	0	0	0	0	0	0	0	0	0	1	1
NZ_CP009072	2731545	T	A	missense_variant	DR76_RS13340	surA	0	0	0	0	0	0	0	1	0	0	1	0	0
NZ_CP009072	2774834	C	G	missense_variant	DR76_RS13520	ftsW	0	0	0	0	0	0	0	0	0	0	0	0	1
NZ_CP009072	2779658	C	T	synonymous_variant	DR76_RS13540	ftsQ	1	0	0	0	0	0	0	0	0	0	0	0	0
NZ_CP009072	2825334	T	C	synonymous_variant	DR76_RS13755	DR76_RS13755	0	0	0	0	0	0	0	0	0	0	0	0	1
NZ_CP009072	2888185	G	A	missense_variant	DR76_RS14030	dnaE	0	0	0	0	0	0	0	0	0	0	0	0	1
NZ_CP009072	2928633	A	G,*	intergenic_region	DR76_RS14285-DR76_RS14290	DR76_RS14285-DR76_RS14290	1	2	2	2	2	2	2	0	2	0	2	1	1
NZ_CP009072	2950466	C	T	missense_variant	DR76_RS14405	DR76_RS14405	0	0	0	0	0	0	0	0	0	0	0	1	1
NZ_CP009072	2956251	A	G	synonymous_variant	DR76_RS28400	DR76_RS28400	0	0	0	0	0	0	0	0	0	0	0	1	1
NZ_CP009072	2973960	G	T	missense_variant	DR76_RS14540	cobT	0	0	0	0	0	0	0	0	0	0	0	1	1
NZ_CP009072	2988266	T	A	missense_variant	DR76_RS14575	clbB	0	1	1	1	1	1	1	1	1	1	1	0	0
NZ_CP009072	3010035	C	T,*	missense_variant	DR76_RS14620	clbK	0	1	1	1	1	1	2	2	1	2	2	0	0
NZ_CP009072	3044851	C	A	missense_variant	DR76_RS14740	fyuA	0	1	0	0	1	1	1	1	1	1	1	0	0
NZ_CP009072	3051637	C	T	missense_variant	DR76_RS14760	irp1	0	0	0	0	0	0	0	0	0	0	0	1	1
NZ_CP009072	3052227	T	G	missense_variant	DR76_RS14760	irp1	0	0	0	0	0	0	0	0	0	0	0	0	1
NZ_CP009072	3086869	C	*,T	intergenic_region	DR76_RS14890-DR76_RS14895	DR76_RS14890-DR76_RS14895	0	0	1	1	0	0	1	0	1	1	1	2	2
NZ_CP009072	3116280	C	T	missense_variant	DR76_RS15050	rcsA	0	0	0	0	0	0	0	0	0	0	0	0	1
NZ_CP009072	3124886	C	A	missense_variant	DR76_RS15110	fliG	0	0	0	0	0	0	0	0	0	0	0	0	1
NZ_CP009072	3148006	G	A	missense_variant	DR76_RS15245	uvrY	0	0	0	0	0	0	1	0	0	0	0	0	0
NZ_CP009072	3160194	G	A	missense_variant	DR76_RS15325	araH	0	0	0	0	0	0	0	0	0	0	0	1	0
NZ_CP009072	3165821	C	A	synonymous_variant	DR76_RS15360	motB	0	0	0	0	0	0	0	0	0	0	0	1	0
NZ_CP009072	3171485	G	T	missense_variant	DR76_RS15385	cheR	0	0	0	0	0	0	0	0	0	0	0	0	1
NZ_CP009072	3192660	A	G	missense_variant	DR76_RS15485	ruvC	0	0	0	0	0	0	0	0	0	0	0	1	1
NZ_CP009072	3199903	C	T	missense_variant	DR76_RS15525	lpxM	0	0	0	0	0	0	0	0	0	0	0	0	1
NZ_CP009072	3206689	G	T	missense_variant	DR76_RS15550	edd	0	0	0	0	0	0	0	0	0	0	0	0	1
NZ_CP009072	3249986	A	G	intergenic_region	DR76_RS15815-DR76_RS15820	yeaY-fadD	0	0	0	0	0	0	1	1	0	1	1	0	0
NZ_CP009072	3286210	G	A	intergenic_region	DR76_RS16015-DR76_RS16025	DR76_RS16015-selD	0	0	0	0	0	0	0	0	0	0	0	0	1
NZ_CP009072	3287088	C	T	synonymous_variant	DR76_RS16025	selD	0	0	0	0	0	0	0	0	0	0	0	0	1
NZ_CP009072	3323846	A	G	synonymous_variant	DR76_RS16205	cedA	0	0	0	0	0	0	0	0	0	0	0	1	1
NZ_CP009072	3324932	T	A	missense_variant	DR76_RS16210	DR76_RS16210	0	0	0	0	0	0	0	0	0	0	0	1	0
NZ_CP009072	3327500	G	A	missense_variant	DR76_RS16225	DR76_RS16225	0	0	0	0	0	0	0	0	0	0	0	1	1
NZ_CP009072	3331795	G	*,A	missense_variant	DR76_RS29130	DR76_RS29130	0	0	0	0	0	0	0	0	1	1	0	2	2
NZ_CP009072	3353480	C	T	missense_variant	DR76_RS16365	DR76_RS16365	0	0	0	0	0	0	0	0	0	0	0	1	1
NZ_CP009072	3354680	T	A	missense_variant	DR76_RS16370	DR76_RS16370	0	0	0	0	0	0	0	0	0	0	0	0	1
NZ_CP009072	3362036	C	T	synonymous_variant	DR76_RS16410	DR76_RS16410	0	0	0	0	0	0	0	0	0	0	0	1	1
NZ_CP009072	3371773	C	A	missense_variant	DR76_RS16450	sufB	1	0	0	0	0	0	0	0	0	0	0	0	0
NZ_CP009072	3417332	C	T	missense_variant	DR76_RS16700	dtpA	0	0	0	0	0	0	0	0	0	0	0	0	1
NZ_CP009072	3428400	C	T	missense_variant	DR76_RS16765	DR76_RS16765	0	1	1	1	1	1	1	1	1	1	1	0	0
NZ_CP009072	3429944	C	T	missense_variant	DR76_RS16775	malX	0	1	1	1	1	1	1	1	1	1	1	0	0
NZ_CP009072	3444278	A	*,C	missense_variant	DR76_RS16825	fumC	0	0	0	0	0	0	0	0	0	0	1	0	2
NZ_CP009072	3472763	T	*,C	intergenic_region	DR76_RS16950-DR76_RS16955	DR76_RS16950-DR76_RS16955	0	0	0	0	1	0	0	0	1	0	0	0	2
NZ_CP009072	3472879	C	*,T	missense_variant	DR76_RS16955	DR76_RS16955	0	0	0	0	0	0	0	0	1	0	0	0	2
NZ_CP009072	3480570	G	A,*	synonymous_variant	DR76_RS17000	DR76_RS17000	0	1	1	1	1	1	1	1	1	2	1	2	2
NZ_CP009072	3482121	C	*,T	intergenic_region	DR76_RS17000-DR76_RS17005	DR76_RS17000-DR76_RS17005	0	1	1	1	1	1	2	1	1	1	1	1	1
NZ_CP009072	3486053	T	*,G	synonymous_variant	DR76_RS17040	DR76_RS17040	--	--	--	--	--	--	--	--	--	--	--	2	0
NZ_CP009072	3486076	C	*,A	missense_variant	DR76_RS17040	DR76_RS17040	--	2	--	0	--	--	--	2	--	--	--	--	--
NZ_CP009072	3486397	G	C,*	missense_variant	DR76_RS17045	DR76_RS17045	1	1	1	1	1	1	0	1	1	2	2	1	1
NZ_CP009072	3489182	T	*,C	missense_variant	DR76_RS17060	DR76_RS17060	0	1	1	1	1	1	1	1	1	1	1	2	2
NZ_CP009072	3490093	C	T,*	synonymous_variant	DR76_RS28490	DR76_RS28490	1	--	--	--	0	--	1	1	--	--	--	1	1
NZ_CP009072	3490096	T	C,*	synonymous_variant	DR76_RS28490	DR76_RS28490	1	--	--	0	0	--	1	1	--	--	--	1	1
NZ_CP009072	3490099	C	T,*	synonymous_variant	DR76_RS28490	DR76_RS28490	1	--	--	0	--	--	1	1	--	--	--	1	1
NZ_CP009072	3490160	G	C,*	missense_variant	DR76_RS28490	DR76_RS28490	1	--	1	1	1	0	1	1	--	--	--	1	1
NZ_CP009072	3558399	C	A	missense_variant	DR76_RS17465	DR76_RS17465	0	1	0	0	1	1	1	1	1	1	1	0	0
NZ_CP009072	3561437	T	G	missense_variant	DR76_RS17475	DR76_RS17475	0	0	0	0	0	0	0	0	0	0	0	0	1
NZ_CP009072	3576364	G	*,A	missense_variant	DR76_RS17530	DR76_RS17530	0	0	0	0	0	0	0	0	0	1	0	2	2
NZ_CP009072	3589103	G	A	missense_variant	DR76_RS17580	maeA	0	0	0	0	0	0	0	0	0	0	0	1	1
NZ_CP009072	3604915	G	A	missense_variant	DR76_RS17640	narW	1	0	0	0	0	0	0	0	0	0	0	0	0
NZ_CP009072	3605191	T	G	missense_variant	DR76_RS17640	narW	0	1	1	1	1	1	1	1	1	1	1	0	0
NZ_CP009072	3617071	C	T	missense_variant	DR76_RS17715	DR76_RS17715	0	0	0	0	0	0	0	0	0	0	0	1	1
NZ_CP009072	3619651	T	*,C	synonymous_variant	DR76_RS17725	tssI	--	2	--	--	--	2	0	--	--	--	--	2	2
NZ_CP009072	3619661	T	*,A	missense_variant	DR76_RS17725	tssI	--	--	--	0	2	2	2	2	--	--	--	2	2
NZ_CP009072	3621376	G	*,A	missense_variant	DR76_RS17735	DR76_RS17735	0	0	0	0	0	0	1	2	1	1	1	0	0
NZ_CP009072	3647974	T	G	missense_variant	DR76_RS17885	DR76_RS17885	0	0	0	0	0	0	0	0	0	0	0	1	1
NZ_CP009072	3676877	C	T,*	missense_variant	DR76_RS17980	DR76_RS17980	1	0	0	0	0	0	0	0	0	0	2	0	0
NZ_CP009072	3720566	G	A	synonymous_variant	DR76_RS18200	DR76_RS18200	0	0	0	0	0	0	0	1	0	1	1	0	0
NZ_CP009072	3749532	G	A	missense_variant	DR76_RS18340	pdeR	0	1	1	1	1	1	1	1	1	1	1	0	0
NZ_CP009072	3756527	G	A	missense_variant	DR76_RS18390	acnA	1	0	0	0	0	0	0	0	0	0	0	0	0
NZ_CP009072	3760134	A	T	stop_gained	DR76_RS18415	cysB	0	0	0	0	0	0	0	0	0	0	0	0	1
NZ_CP009072	3776916	G	A	missense_variant	DR76_RS18490	trpB	1	0	0	0	0	0	0	0	0	0	0	0	0
NZ_CP009072	3821147	T	C,*	synonymous_variant	DR76_RS18700	narK	1	0	0	0	0	0	0	0	0	2	0	0	0
NZ_CP009072	3821861	G	A	missense_variant	DR76_RS18710	narX	1	0	0	0	0	0	0	0	0	0	0	0	0
NZ_CP009072	3829244	G	T	intergenic_region	DR76_RS18745-DR76_RS18750	DR76_RS18745-kdsA	0	1	1	1	1	1	1	1	1	1	1	0	0
NZ_CP009072	3830971	C	T	intergenic_region	DR76_RS18755-DR76_RS18760	DR76_RS18755-DR76_RS18760	0	0	0	0	0	0	0	0	0	0	0	1	1
NZ_CP009072	3889808	C	T	synonymous_variant	DR76_RS19100	sitC	0	1	0	1	1	1	1	1	1	1	1	0	0
NZ_CP009072	3917839	T	A	missense_variant	DR76_RS19265	ompC	0	0	0	0	0	0	0	0	0	0	0	0	1
NZ_CP009072	3929176	C	T	synonymous_variant	DR76_RS19385	DR76_RS19385	0	0	0	0	0	0	0	0	0	0	0	0	1
NZ_CP009072	3940117	A	T	missense_variant	DR76_RS19500	rluE	0	0	0	0	0	0	0	0	0	0	0	0	1
NZ_CP009072	3952185	A	*,C	synonymous_variant	DR76_RS19565	DR76_RS19565	0	1	1	1	1	1	1	2	1	1	1	1	1
NZ_CP009072	3962454	G	A,*	synonymous_variant	DR76_RS19605	DR76_RS19605	1	1	1	1	1	1	1	1	1	--	1	--	0
NZ_CP009072	3962899	T	C,*	missense_variant	DR76_RS19605	DR76_RS19605	0	1	1	1	1	1	1	1	1	1	1	--	--
NZ_CP009072	3965183	T	C	missense_variant	DR76_RS19615	DR76_RS19615	0	0	0	0	0	0	0	0	0	0	0	1	1
NZ_CP009072	3968629	G	C,*	synonymous_variant	DR76_RS19645	DR76_RS19645	1	0	1	1	1	1	1	1	1	2	2	1	1
NZ_CP009072	3970079	A	G,*	synonymous_variant	DR76_RS19655	DR76_RS19655	1	0	1	1	1	1	1	1	2	2	1	1	1
NZ_CP009072	3971639	A	C,*	synonymous_variant	DR76_RS19665	DR76_RS19665	1	1	1	1	1	1	1	1	0	2	2	1	1
NZ_CP009072	3978711	C	T	intergenic_region	DR76_RS28605-DR76_RS19730	DR76_RS28605-DR76_RS19730	1	0	0	0	0	0	0	0	0	0	0	0	0
NZ_CP009072	3985344	C	*,T	missense_variant	DR76_RS19785	DR76_RS19785	1	0	1	1	1	2	1	2	1	1	1	1	1
NZ_CP009072	3986038	G	*,A	missense_variant	DR76_RS19790	DR76_RS19790	0	--	--	2	--	--	--	--	--	--	--	--	--
NZ_CP009072	3986249	A	G,*	synonymous_variant	DR76_RS19790	DR76_RS19790	1	1	1	1	--	1	1	1	0	--	1	--	--
NZ_CP009072	3986837	G	*,T	intergenic_region	DR76_RS28610-DR76_RS19800	DR76_RS28610-hokD	1	1	1	2	1	1	0	2	1	1	1	2	2
NZ_CP009072	3988141	T	*,C	missense_variant	DR76_RS19815	DR76_RS19815	--	2	2	2	2	2	2	2	0	0	2	--	--
NZ_CP009072	3988217	T	*,C	missense_variant	DR76_RS19815	DR76_RS19815	--	2	2	2	2	2	2	2	2	0	2	--	--
NZ_CP009072	3996050	G	*,A	intergenic_region	DR76_RS19905-DR76_RS19915	DR76_RS19905-DR76_RS19915	0	1	2	1	1	1	1	1	1	1	1	0	0
NZ_CP009072	3996730	G	A,*	synonymous_variant	DR76_RS19925	DR76_RS19925	1	1	1	0	2	1	1	1	2	1	1	1	1
NZ_CP009072	4088293	G	A,*	synonymous_variant	DR76_RS20430	DR76_RS20430	1	1	1	1	1	--	--	--	0	--	--	--	--
NZ_CP009072	4088323	A	*,G	synonymous_variant	DR76_RS20430	DR76_RS20430	--	--	--	2	2	--	0	--	--	--	--	--	--
NZ_CP009072	4088326	A	*,G	synonymous_variant	DR76_RS20430	DR76_RS20430	--	--	0	--	2	--	0	--	--	--	--	--	--
NZ_CP009072	4088835	C	T	synonymous_variant	DR76_RS20435	DR76_RS20435	0	0	0	0	0	0	0	0	0	0	0	0	1
NZ_CP009072	4161202	A	G,*	missense_variant	DR76_RS29440	DR76_RS29440	0	1	1	1	1	1	1	1	1	1	2	2	2
NZ_CP009072	4273844	C	T,*	synonymous_variant	DR76_RS21365	pyrD	1	0	0	2	2	0	0	0	0	0	0	0	0
NZ_CP009072	4280040	C	T	missense_variant	DR76_RS21395	pepN	0	0	0	0	0	0	0	0	0	0	0	1	1
NZ_CP009072	4286420	T	G	missense_variant	DR76_RS21410	ompF	0	1	1	1	1	1	1	1	1	1	1	0	0
NZ_CP009072	4305114	G	A	missense_variant	DR76_RS21490	msbA	0	0	0	0	0	0	0	0	0	0	0	0	1
NZ_CP009072	4314643	T	A	synonymous_variant	DR76_RS21525	serC	0	0	0	0	0	0	0	0	0	0	0	1	1
NZ_CP009072	4406532	G	A	missense_variant	DR76_RS21940	DR76_RS21940	0	0	0	0	0	0	0	0	0	0	0	1	1
NZ_CP009072	4424667	C	T	synonymous_variant	DR76_RS22025	rlmF	0	0	0	0	0	0	0	0	0	0	0	1	1
NZ_CP009072	4425811	C	T	intergenic_region	DR76_RS29325-DR76_RS22035	DR76_RS29325-DR76_RS22035	0	0	0	0	0	0	0	0	0	0	0	1	1
NZ_CP009072	4427782	G	T	missense_variant	DR76_RS22035	DR76_RS22035	0	0	0	0	0	0	0	0	0	0	0	0	1
NZ_CP009072	4444789	G	T	missense_variant	DR76_RS22115	clsB	0	0	0	0	0	0	0	0	0	0	0	0	1
NZ_CP009072	4460267	G	A	stop_gained	DR76_RS22200	tnpB	0	0	0	0	0	0	0	0	0	0	0	1	1
NZ_CP009072	4484623	T	G	missense_variant	DR76_RS22325	pnuC	0	1	1	1	1	1	1	1	1	1	1	0	0
NZ_CP009072	4504230	C	T	synonymous_variant	DR76_RS22450	sucA	0	0	0	0	0	0	0	0	0	0	0	0	1
NZ_CP009072	4508782	A	G,*	intergenic_region	DR76_RS22475-DR76_RS29330	sdhC-DR76_RS29330	1	0	0	2	2	0	2	2	2	2	2	0	0
NZ_CP009072	4528475	A	*,G	missense_variant	DR76_RS29335	DR76_RS29335	0	0	0	0	1	0	0	0	0	0	0	0	2
NZ_CP009072	4532297	C	T	synonymous_variant	DR76_RS22585	potE	0	1	1	1	1	1	1	1	1	1	1	0	0
NZ_CP009072	4542907	C	T	synonymous_variant	DR76_RS22650	DR76_RS22650	0	0	0	0	0	0	0	0	0	0	0	1	1
NZ_CP009072	4559486	C	T	intragenic_variant	DR76_RS22730	DR76_RS22730	0	1	0	0	1	1	1	1	1	1	1	0	0
NZ_CP009072	4596335	A	*,T	missense_variant	DR76_RS22935	dpiB	0	0	0	0	1	0	0	0	1	1	0	2	2
NZ_CP009072	4596887	G	A,*	missense_variant	DR76_RS22940	citC	1	0	0	0	2	0	0	0	0	0	0	0	0
NZ_CP009072	4606266	G	A	synonymous_variant	DR76_RS22990	ahpF	0	0	0	0	0	0	0	0	0	0	0	1	1
NZ_CP009072	4613633	G	A	synonymous_variant	DR76_RS23020	ybdL	0	0	0	0	0	0	0	0	0	0	0	1	1
NZ_CP009072	4680946	A	T	missense_variant	DR76_RS23340	allB	1	0	0	0	0	0	0	0	0	0	0	0	0
NZ_CP009072	4684130	G	T	missense_variant	DR76_RS23355	DR76_RS23355	1	0	0	0	0	0	0	0	0	0	0	0	0
NZ_CP009072	4707383	C	T	synonymous_variant	DR76_RS23460	DR76_RS23460	1	0	0	0	0	0	0	0	0	0	0	0	0
NZ_CP009072	4726828	C	T	missense_variant	DR76_RS23550	mscK	1	1	1	1	1	1	1	1	1	1	1	0	0
NZ_CP009072	4726835	C	A	missense_variant	DR76_RS23550	mscK	0	0	0	0	0	0	0	0	0	0	0	1	0
NZ_CP009072	4727517	A	G	synonymous_variant	DR76_RS23550	mscK	1	1	1	1	1	1	1	1	1	1	1	0	0
NZ_CP009072	4746125	G	*,T	missense_variant	DR76_RS23635	DR76_RS23635	0	0	0	0	0	0	0	0	0	1	0	0	2
NZ_CP009072	4792809	G	A	missense_variant	DR76_RS23865	proY	0	0	0	0	0	0	0	0	0	0	0	0	1
NZ_CP009072	4805885	G	T	missense_variant	DR76_RS23910	DR76_RS23910	0	0	0	0	0	0	0	0	0	0	0	1	0
NZ_CP009072	4827635	G	A	missense_variant	DR76_RS24050	tauB	1	0	0	0	0	0	0	0	0	0	0	0	0
NZ_CP009072	4884895	C	T	missense_variant	DR76_RS24300	DR76_RS24300	0	0	0	0	0	0	1	1	0	1	1	0	0
NZ_CP009072	4884984	A	G	missense_variant	DR76_RS24300	DR76_RS24300	0	0	0	0	0	0	1	0	0	0	0	0	0
NZ_CP009072	4887664	G	A,*	missense_variant	DR76_RS24320	DR76_RS24320	1	0	0	0	0	0	0	0	0	2	0	0	0
NZ_CP009072	4899724	T	*,G	intergenic_region	DR76_RS24355-DR76_RS24360	DR76_RS24355-DR76_RS24360	0	0	1	0	0	0	1	0	1	1	0	2	2
NZ_CP009072	4912207	A	*,G	intergenic_region	DR76_RS24415-DR76_RS28760	DR76_RS24415-DR76_RS28760	0	0	0	0	0	0	1	0	0	1	1	2	2
NZ_CP009072	4967178	T	G,*	synonymous_variant	DR76_RS24655	DR76_RS24655	0	1	1	1	2	1	1	2	2	2	1	2	2
NZ_CP009072	4985439	G	*,A	synonymous_variant	DR76_RS24705	rbsK	--	--	--	--	--	--	--	--	0	--	--	2	2
NZ_CP009072	4985607	C	*,A	synonymous_variant	DR76_RS24705	rbsK	--	--	--	--	--	--	--	--	0	--	--	2	2
NZ_CP009072	4987606	A	*,G	intergenic_region	DR76_RS24715-DR76_RS24730	DR76_RS24715-DR76_RS24730	1	1	1	1	1	1	1	1	1	0	1	2	2
NZ_CP009072	4997187	C	*,A	synonymous_variant	DR76_RS24765	DR76_RS24765	0	1	0	0	0	0	1	1	0	2	1	0	0
NZ_CP009072	4999942	A	C	intergenic_region	DR76_RS24785-DR76_RS24790	DR76_RS24785-DR76_RS24790	0	1	1	1	1	1	1	1	1	1	1	0	0
NZ_CP009072	5015348	G	*,T	missense_variant	DR76_RS24860	DR76_RS24860	1	0	1	1	1	0	1	0	1	0	1	2	2
NZ_CP009072	5018546	C	A	intergenic_region	DR76_RS24880-DR76_RS24885	DR76_RS24880-DR76_RS24885	0	1	0	1	1	1	1	1	1	1	1	0	0
NZ_CP009072	5021630	C	*,T	synonymous_variant	DR76_RS24890	DR76_RS24890	0	0	0	0	0	0	1	1	0	1	0	0	2
NZ_CP009072	5053091	A	*,G	missense_variant	DR76_RS25080	cpsB	0	0	0	0	0	0	0	0	0	1	0	2	0
NZ_CP009072	5055673	G	*,C	missense_variant	DR76_RS25090	galE	0	0	0	0	1	0	0	0	1	1	0	0	2
NZ_CP009072	5057860	T	*,C	missense_variant	DR76_RS25100	DR76_RS25100	1	1	1	1	1	1	1	1	1	1	1	0	2
NZ_CP009072	5079599	G	A	missense_variant	DR76_RS25190	wcaD	0	0	0	0	0	0	0	0	0	0	0	0	1
NZ_CP009072	5083538	G	T	missense_variant	DR76_RS25210	wzc	0	1	0	1	1	1	1	1	1	1	1	0	0
NZ_CP009072	5108548	G	A	missense_variant	DR76_RS25285	mdtC	0	0	0	0	0	0	0	0	0	0	0	1	1
